# Supplementary material for: Density Functional Theory Studies and Molecular Docking on Xanthohumol, 8-Prenylnaringenin and Their Symmetric Substitute Diethanolamine Derivatives as Inhibitors for Colon Cancer-Related Proteins
Source: MDPI journal article supplement (doi:10.3390/sym13060948), 2021-05-26
Supplement: s1 [file s1]

# Density Functional Theory Studies and Molecular Docking on Xanthohumol, 8-Prenylnaringenin and Their Symmetric Substitute Diethanolamine Derivatives as Inhibitors for Colon Cancer-Related Proteins

Manos C. Vlasiou\*, Christos C. Petrou, Yiannis Sarigiannis and Kyriaki S. Pafiti

Department of Life and Health Sciences, University of Nicosia, Nicosia 2417, Cyprus  
petrou.c@unic.ac.cy (C.C.P.); sarigiannis.i@unic.ac.cy (Y.S.); pafiti.k@unic.ac.cy (K.S.P.)

\* Correspondence: vlasiou.m@unic.ac.cy

**S1 Figure:** Root-mean-square deviation (RMSD) values (y-axis) along the time frame (x-axis) for atoms of the protein-8Prenylnaringenin derivative complex and protein-Xanthohumol derivative complex.

**S1 Table:** Bond lengths of the Xanthohumol and 8-Prenylnaringenin derivatives.

**S2 Table:** Bond angles of the Xanthohumol and 8-Prenylnaringenin derivatives.

**S3 Table:** Atomic charges of the Xanthohumol and 8-Prenylnaringenin derivatives.

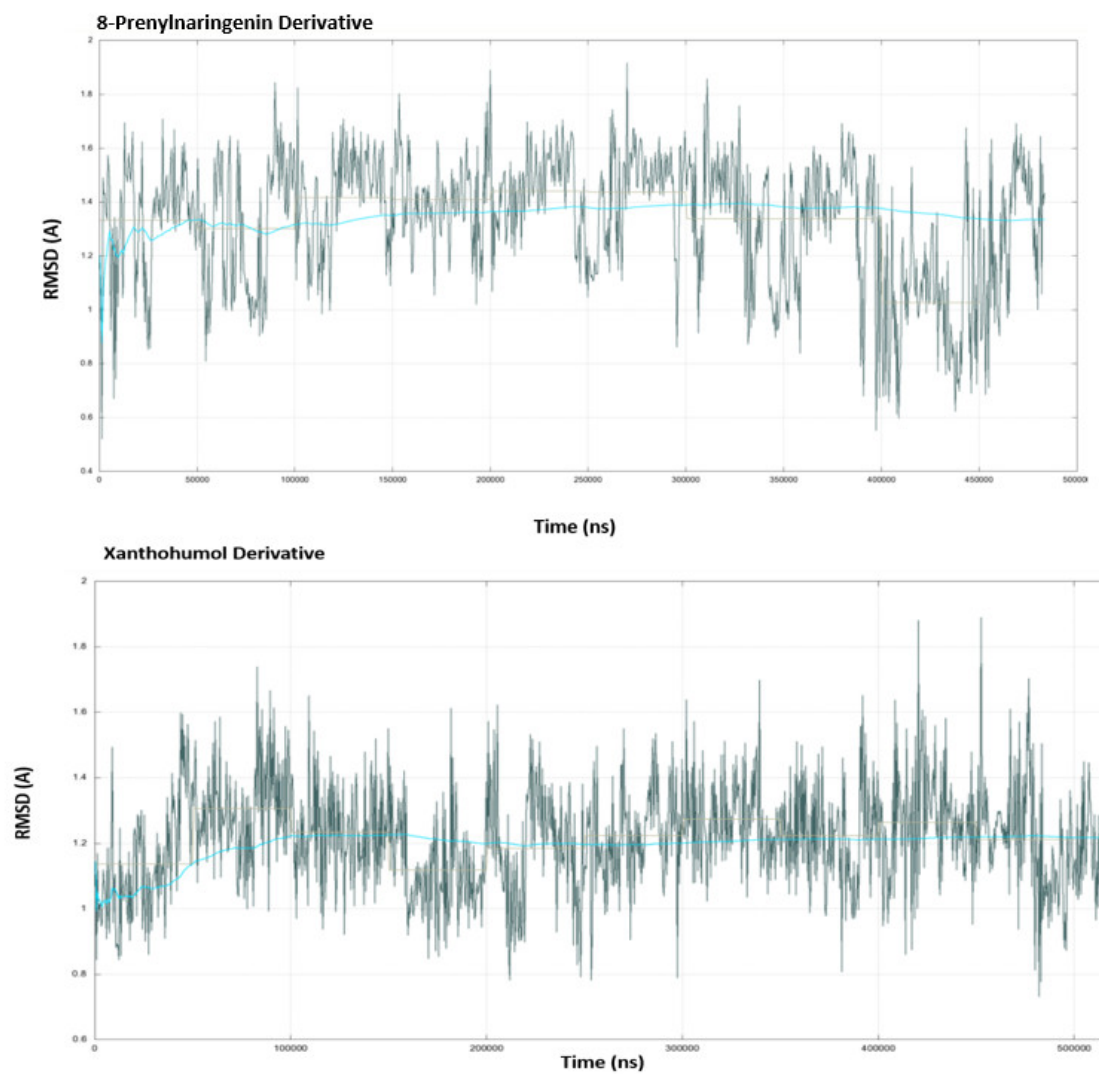

**S1 Figure:** Root-mean-square deviation (RMSD) values (y-axis) along the time frame (x-axis) for atoms of the protein-8Prenylnaringin derivative complex and protein-Xanthohumol derivative complex.

**S1 Table:** Bond lengths of the Xanthohumol and 8-Prenylnaringenin derivatives.

| Atom<br>Xanthohumol<br>Derivative | Bond Length<br>Actual (Å) | Bond Length<br>Optimal (Å) | Bond Angle Actual | Bond Angle<br>Optimal |
|-----------------------------------|---------------------------|----------------------------|-------------------|-----------------------|
| O(34)-H(67)                       | 0.9602                    | 0.9610                     | H(67)-O(34)-C(33) | 109.2515              |
| C(33)-H(66)                       | 1.1133                    | 1.1110                     | H(66)-C(33)-H(65) | 109.4346              |
| C(33)-H(65)                       | 1.1121                    | 1.1110                     | H(66)-C(33)-O(34) | 107.1432              |
| C(33)-O(34)                       | 1.4146                    | 1.4080                     | H(66)-C(33)-C(32) | 111.2957              |
| C(32)-H(64)                       | 1.1149                    | 1.1130                     | H(65)-C(33)-O(34) | 106.4787              |
| C(32)-H(63)                       | 1.1161                    | 1.1130                     | H(65)-C(33)-C(32) | 112.8275              |
| C(32)-C(33)                       | 1.5297                    | 1.5140                     | O(34)-C(33)-C(32) | 109.3932              |
| O(31)-H(62)                       | 0.9603                    | 0.9610                     | H(64)-C(32)-H(63) | 107.1842              |
| C(30)-H(61)                       | 1.1134                    | 1.1110                     | H(64)-C(32)-C(33) | 108.6036              |
| C(30)-H(60)                       | 1.1124                    | 1.1110                     | C(33)-C(32)-N(28) | 113.8698              |
| C(30)-O(31)                       | 1.4147                    | 1.4080                     | H(62)-O(31)-C(30) | 109.3392              |
| C(29)-H(59)                       | 1.1162                    | 1.1130                     | H(61)-C(30)-H(60) | 109.5652              |
| C(29)-H(58)                       | 1.1155                    | 1.1130                     | H(61)-C(30)-O(31) | 107.1315              |
| C(29)-C(30)                       | 1.5299                    | 1.5140                     | H(61)-C(30)-C(29) | 111.3585              |
| N(28)-C(32)                       | 1.4621                    | 1.4380                     | H(60)-C(30)-O(31) | 106.3492              |
| N(28)-C(29)                       | 1.4619                    | 1.4380                     | H(60)-C(30)-C(29) | 112.7064              |
| C(27)-H(57)                       | 1.1044                    | 1.1130                     | O(31)-C(30)-C(29) | 109.4585              |
| C(27)-H(56)                       | 1.1154                    | 1.1130                     | H(59)-C(29)-H(58) | 107.0890              |
| C(27)-N(28)                       | 1.4638                    | 1.4380                     | H(59)-C(29)-C(30) | 109.1427              |
| O(26)-H(55)                       | 0.9709                    | 0.9720                     | C(33)-C(32)-N(28) | 113.8698              |
| C(25)-C(27)                       | 1.5260                    | 1.4970                     | H(62)-O(31)-C(30) | 109.3392              |

**S2 Table:** Bond angles of the Xanthohumol and 8-Prenylnaringenin derivatives.

| Atom<br>8-Prenylnaringenin<br>Derivative | Bond Length<br>Actual (Å) | Bond Length<br>Optimal (Å) | Bond Angle Actual | Bond Angle<br>Optimal |
|------------------------------------------|---------------------------|----------------------------|-------------------|-----------------------|
| O(33)-H(64)                              | 0.9601                    | 0.9610                     | H(64)-O(33)-C(32) | 109.3757              |
| C(32)-H(63)                              | 1.1131                    | 1.1110                     | H(63)-C(32)-H(62) | 109.4744              |
| C(32)-H(62)                              | 1.1121                    | 1.1110                     | H(63)-C(32)-O(33) | 107.2782              |
| C(31)-H(61)                              | 1.1144                    | 1.1130                     | H(63)-C(32)-C(31) | 111.3428              |
| C(31)-H(60)                              | 1.1157                    | 1.1130                     | H(62)-C(32)-O(33) | 106.5672              |
| O(30)-H(59)                              | 0.9602                    | 0.9610                     | H(62)-C(32)-C(31) | 112.6167              |
| C(29)-H(58)                              | 1.1118                    | 1.1110                     | O(33)-C(32)-C(31) | 109.3117              |
| C(29)-H(57)                              | 1.1117                    | 1.1110                     | H(61)-C(31)-H(60) | 106.4268              |
| C(28)-H(56)                              | 1.1151                    | 1.1130                     | H(61)-C(31)-C(32) | 109.4620              |
| C(28)-H(55)                              | 1.1168                    | 1.1130                     | H(59)-O(30)-C(29) | 109.4713              |
| C(26)-H(54)                              | 1.1070                    | 1.1130                     | H(58)-C(29)-H(57) | 109.0734              |
| C(26)-H(53)                              | 1.1166                    | 1.1130                     | H(58)-C(29)-O(30) | 106.6903              |
| C(25)-H(52)                              | 1.1132                    | 1.1130                     | H(58)-C(29)-C(28) | 112.5453              |
| C(25)-H(51)                              | 1.1081                    | 1.1130                     | H(57)-C(29)-O(30) | 106.5982              |
| C(25)-H(50)                              | 1.1133                    | 1.1130                     | H(57)-C(29)-C(28) | 112.5316              |
| O(24)-H(49)                              | 0.9708                    | 0.9720                     | O(30)-C(29)-C(28) | 109.0664              |
| O(23)-H(48)                              | 0.9642                    | 0.9720                     | H(56)-C(28)-H(55) | 103.8769              |
| O(22)-H(47)                              | 0.9709                    | 0.9720                     | H(56)-C(28)-C(29) | 108.9133              |
| C(20)-H(46)                              | 1.1029                    | 1.1000                     | H(59)-O(30)-C(29) | 109.4713              |
| C(18)-H(45)                              | 1.1028                    | 1.1000                     | C(31)-N(27)-C(28) | 113.6412              |
| C(17)-H(44)                              | 1.1030                    | 1.1000                     | C(31)-N(27)-C(26) | 110.6734              |

**S3 Table:** Atomic charges of the Xanthohumol and 8-Prenylnaringenin derivatives.

| Atom<br>(Xanthohumol<br>Derivative) | Huckel<br>Charges | Atom (8-<br>Prenylnaringenin<br>Derivative) | Huckel<br>Charges |
|-------------------------------------|-------------------|---------------------------------------------|-------------------|
| C(1)                                | 0.253132          | C(1)                                        | -0.135827         |
| C(2)                                | -0.210702         | C(2)                                        | 0.0544411         |
| C(3)                                | 0.283483          | C(3)                                        | -0.106989         |
| C(4)                                | -0.135689         | C(4)                                        | -0.075156         |
| C(5)                                | 0.256933          | C(5)                                        | -0.0915145        |
| C(6)                                | -0.096558         | C(6)                                        | 0.263514          |
| O(7)                                | -0.28014          | C(7)                                        | -0.218512         |
| O(8)                                | -0.284228         | C(8)                                        | 0.274666          |
| O(9)                                | -0.264119         | C(9)                                        | -0.161194         |
| C(10)                               | 0.0907518         | C(10)                                       | 0.264306          |
| C(11)                               | -0.0700673        | O(11)                                       | -0.230673         |
| C(12)                               | -0.10036          | C(12)                                       | 0.207376          |
| C(13)                               | 0.0558938         | C(13)                                       | -0.130401         |
| C(14)                               | -0.135778         | C(14)                                       | 0.436209          |
| C(15)                               | -0.139015         | O(15)                                       | -0.625994         |
| C(16)                               | 0.392511          | C(16)                                       | -0.0392965        |
| C(17)                               | -0.164622         | C(17)                                       | -0.0397658        |
| O(18)                               | -0.702263         | C(18)                                       | -0.118305         |
| C(19)                               | 0.0847444         | C(19)                                       | 0.243305          |
| C(20)                               | -0.0304084        | C(20)                                       | -0.133341         |
| C(21)                               | 0.0114225         | C(21)                                       | 0.0534758         |
| C(22)                               | -0.112686         | O(22)                                       | -0.267755         |
| C(23)                               | 0.27799           | O(23)                                       | -0.250495         |
| C(24)                               | -0.128902         | O(24)                                       | -0.243384         |
| C(25)                               | 0.0994122         | C(25)                                       | -0.14531          |
| O(26)                               | -0.231647         | C(26)                                       | 0.00754896        |
| C(27)                               | -0.000756697      | N(27)                                       | -0.115866         |
| N(28)                               | -0.107473         | C(28)                                       | 0.0163106         |
| C(29)                               | 0.0153326         | C(29)                                       | 0.119224          |
| C(30)                               | 0.146912          | O(30)                                       | -0.372973         |
